# Supplementary material for: Association among starch storage, metabolism, related genes and growth of Moso bamboo (Phyllostachys heterocycla) shoots
Source: PubMed Central journal article supplement (PMC8527747; doi:10.1186/s12870-021-03257-2), 2021-10-20
Supplement: 12870_2021_3257_MOESM1_ESM.pdf [file 12870_2021_3257_MOESM1_ESM.pdf]

**Supplementary File 1****Table S1** Sample sequencing data statistics

| Sample | Raw reads | Clean reads | Error rate(%) | Q20(%) | Q30(%) | GC content(%) |
|--------|-----------|-------------|---------------|--------|--------|---------------|
| S0_T1  | 45790168  | 45407670    | 0.0233        | 98.68  | 95.86  | 52.49         |
| S0_T2  | 47961938  | 47536530    | 0.0231        | 98.75  | 96.08  | 52.46         |
| S0_T3  | 47953016  | 47546070    | 0.0233        | 98.71  | 95.96  | 52.69         |
| S0_B1  | 47412630  | 46982928    | 0.0232        | 98.74  | 96.06  | 53.41         |
| S0_B2  | 47152968  | 46728392    | 0.023         | 98.8   | 96.21  | 52.88         |
| S0_B3  | 46082548  | 45688254    | 0.023         | 98.83  | 96.3   | 53.34         |
| S1_T1  | 52051874  | 51640742    | 0.0232        | 98.73  | 96.03  | 54.55         |
| S1_T2  | 51789682  | 51367640    | 0.023         | 98.82  | 96.29  | 54.37         |
| S1_T3  | 49911624  | 49502850    | 0.0231        | 98.76  | 96.13  | 53.94         |
| S1_B1  | 48014520  | 47622274    | 0.0228        | 98.88  | 96.52  | 55.48         |
| S1_B2  | 56617666  | 56144040    | 0.023         | 98.78  | 96.25  | 55.12         |
| S1_B3  | 52100624  | 51610414    | 0.0233        | 98.68  | 95.92  | 55.15         |
| S2_T1  | 49891388  | 49475466    | 0.0229        | 98.84  | 96.35  | 54.01         |
| S2_T2  | 49545084  | 49143304    | 0.0229        | 98.86  | 96.41  | 54.08         |
| S2_T3  | 51848736  | 51438212    | 0.0228        | 98.91  | 96.52  | 54.66         |
| S2_B1  | 52882350  | 52467454    | 0.0229        | 98.86  | 96.41  | 55.11         |
| S2_B2  | 51963608  | 51534860    | 0.023         | 98.82  | 96.3   | 55.79         |
| S2_B3  | 48934270  | 48524130    | 0.023         | 98.81  | 96.27  | 55.21         |
| S3_T1  | 52737490  | 52324516    | 0.0231        | 98.76  | 96.12  | 54.55         |
| S3_T2  | 56506580  | 56083198    | 0.0229        | 98.85  | 96.38  | 55.04         |
| S3_T3  | 46930874  | 46454594    | 0.0229        | 98.86  | 96.4   | 54.37         |
| S3_B1  | 52056954  | 51592478    | 0.023         | 98.8   | 96.29  | 55.83         |
| S3_B2  | 53069056  | 52636282    | 0.023         | 98.79  | 96.24  | 56.26         |
| S3_B3  | 51280482  | 50824242    | 0.0231        | 98.77  | 96.21  | 56.23         |

Note: (1)Sample:Name of Sample. (2)Raw reads: the total number of items in the original sequencing data (reads, representing a sequencing read, and one reads is one). (3)Clean reads: the total number of items in sequencing data after quality control. (4)Error rate(%): the average Error rate of sequencing bases corresponding to quality control data is generally less than 0.1%. (5)Q20(%), Q30(%): The quality of sequencing data after quality control is evaluated. Q20 and Q30 respectively refer to the percentage of bases with sequencing quality above 99% and 99.9% in the total base. Generally, Q20 is above 85% and Q30 is above 80%. (6)GC Content (%): The percentage of the sum of G and C bases corresponding to the quality control data in the total base.

**Table S2** Statistics of sample sequencing comparisons

| Sample | Total reads | Total mapped     | Multiple mapped | Uniquely mapped  |
|--------|-------------|------------------|-----------------|------------------|
| S0_T1  | 45407670    | 43620948(96.07%) | 2599937(5.73%)  | 41021011(90.34%) |
| S0_T2  | 47536530    | 45698283(96.13%) | 2499514(5.26%)  | 43198769(90.87%) |
| S0_T3  | 47546070    | 45704650(96.13%) | 2825575(5.94%)  | 42879075(90.18%) |
| S0_B1  | 46982928    | 44955531(95.68%) | 2900819(6.17%)  | 42054712(89.51%) |
| S0_B2  | 46728392    | 44792089(95.86%) | 2411767(5.16%)  | 42380322(90.7%)  |
| S0_B3  | 45688254    | 43809830(95.89%) | 2640729(5.78%)  | 41169101(90.11%) |
| S1_T1  | 51640742    | 49630914(96.11%) | 2995237(5.8%)   | 46635677(90.31%) |
| S1_T2  | 51367640    | 49399605(96.17%) | 3747791(7.3%)   | 45651814(88.87%) |
| S1_T3  | 49502850    | 47566464(96.09%) | 3642912(7.36%)  | 43923552(88.73%) |
| S1_B1  | 47622274    | 45669788(95.9%)  | 2192025(4.6%)   | 43477763(91.3%)  |
| S1_B2  | 56144040    | 53734630(95.71%) | 2606886(4.64%)  | 51127744(91.07%) |
| S1_B3  | 51610414    | 49499407(95.91%) | 2954516(5.72%)  | 46544891(90.19%) |
| S2_T1  | 49475466    | 47619992(96.25%) | 4061209(8.21%)  | 43558783(88.04%) |
| S2_T2  | 49143304    | 47275738(96.2%)  | 4525766(9.21%)  | 42749972(86.99%) |
| S2_T3  | 51438212    | 49572253(96.37%) | 2590947(5.04%)  | 46981306(91.34%) |
| S2_B1  | 52467454    | 50586905(96.42%) | 2870212(5.47%)  | 47716693(90.95%) |
| S2_B2  | 51534860    | 49543705(96.14%) | 2784079(5.4%)   | 46759626(90.73%) |
| S2_B3  | 48524130    | 46592980(96.02%) | 2337374(4.82%)  | 44255606(91.2%)  |
| S3_T1  | 52324516    | 50371552(96.27%) | 3665287(7.0%)   | 46706265(89.26%) |
| S3_T2  | 56083198    | 53915589(96.14%) | 4236462(7.55%)  | 49679127(88.58%) |
| S3_T3  | 46454594    | 44868554(96.59%) | 5097932(10.97%) | 39770622(85.61%) |
| S3_B1  | 51592478    | 49409203(95.77%) | 3665671(7.11%)  | 45743532(88.66%) |
| S3_B2  | 52636282    | 50635595(96.2%)  | 3060208(5.81%)  | 47575387(90.39%) |
| S3_B3  | 50824242    | 48934792(96.28%) | 2604650(5.12%)  | 46330142(91.16%) |

Note: (1)Sample: Name of Sample. (2)Total reads: the number of filtered sequences (i.e. Clean reads). (3)Total mapped: number of Clean reads that can be mapped into the genome. (4)Multiple mapped: number of Clean reads with Multiple mapped locations in the reference sequence. (5)Unique mapped: Number of Clean reads with a Unique alignment position in the reference sequence.

**Table S3** Expression of DEGs in different stages of Moso bamboo shoots

| Different stages | Total DEGs | Up DEGs | Down DEGs |
|------------------|------------|---------|-----------|
| S1_T             | 9633       | 5863    | 3770      |
| S2_T             | 9749       | 5395    | 4354      |
| S3_T             | 14388      | 7990    | 6398      |
| S1_B             | 10470      | 6596    | 3874      |
| S2_B             | 10771      | 6606    | 4165      |
| S3_B             | 17852      | 9412    | 8440      |

Note: The differential gene expression numbers of S1\_T, S2\_T and S3\_T were all compared with S0\_T, and the differential gene expression numbers of S1\_B, S2\_B and S3\_B were all compared with S0\_B.

**Table S4** Heat map analysis of DEGs involved in starch and sucrose metabolism pathway at the top of Moso bamboo shoots

| Gene_id       | Gene Description                                                                                                                                                     | S0_T   | S1_T    | S2_T    | S3_T    |
|---------------|----------------------------------------------------------------------------------------------------------------------------------------------------------------------|--------|---------|---------|---------|
| PH02Gene01052 | RecName: Full=Soluble starch synthase 2-2, chloroplastic/amyloplastic; AltName: Full=Soluble starch synthase II-2; Flags: Precursor                                  | 1.7030 | -0.2784 | -0.6506 | -0.7740 |
| PH02Gene01266 | RecName: Full=Isoamylase 3, chloroplastic; Short=AtISA3; Flags: Precursor                                                                                            | 1.6772 | -0.2139 | -0.5440 | -0.9193 |
| PH02Gene06165 | RecName: Full=1,4-alpha-glucan-branching enzyme 1, chloroplastic/amyloplastic; AltName: Full=Starch branching enzyme I; Flags: Precursor                             | 1.6682 | -0.2360 | -0.4557 | -0.9766 |
| PH02Gene07736 | RecName: Full=Glucan endo-1,3-beta-glucosidase 4; AltName: Full=(1-3)-beta-glucan endohydrolase 4; Short=(1-3)-beta-glucanase 4; AltName: Full=Beta-1,3-endoglucan   | 1.7210 | -0.4171 | -0.5683 | -0.7356 |
| PH02Gene07829 | RecName: Full=Probable sucrose-phosphate synthase 4; AltName: Full=Sucrose phosphate synthase 4F; Short=OsSPS4F; AltName: Full=UDP-glucose-fructose-phosphate gluco  | 1.6569 | -0.1304 | -0.5730 | -0.9536 |
| PH02Gene12545 | RecName: Full=Glucose-1-phosphate adenylyltransferase large subunit 1, chloroplastic; AltName: Full=ADP-glucose pyrophosphorylase; AltName: Full=ADP-glucose syntha  | 1.5759 | -0.0072 | -0.4060 | -1.1626 |
| PH02Gene13620 | RecName: Full=Glucose-1-phosphate adenylyltransferase small subunit, chloroplastic/amyloplastic; AltName: Full=ADP-glucose pyrophosphorylase; AltName: Full=ADP-glu  | 1.6866 | -0.4760 | -0.2921 | -0.9185 |
| PH02Gene17166 | RecName: Full=Glucose-1-phosphate adenylyltransferase large subunit 2, chloroplastic; AltName: Full=ADP-glucose pyrophosphorylase; AltName: Full=ADP-glucose syntha  | 1.5785 | 0.0545  | -0.5235 | -1.1096 |
| PH02Gene18798 | RecName: Full=Probable alpha,alpha-trehalose-phosphate synthase                                                                                                      | 1.6816 | -0.5221 | -0.2425 | -0.9170 |
| PH02Gene20456 | RecName: Full=Beta-fructofuranosidase, insoluble isoenzyme 4; AltName: Full=Cell wall beta-fructosidase 4; AltName: Full=Invertase 4; AltName: Full=OsCIN4; AltName: | 1.6745 | -0.1592 | -0.6513 | -0.8640 |
| PH02Gene23984 | RecName: Full=Probable alpha,alpha-trehalose-phosphate synthase                                                                                                      | 1.7134 | -0.5854 | -0.3576 | -0.7704 |
| PH02Gene26491 | RecName: Full=Sucrose synthase 4; Short=OsSUS4; AltName: Full=Sucrose-UDP glucosyltransferase 4                                                                      | 1.6790 | -0.1838 | -0.6267 | -0.8685 |
| PH02Gene39746 | RecName: Full=Probable inactive beta-glucosidase 14; Short=Os4bglu14; Flags: Precursor                                                                               | 1.6034 | -0.6435 | 0.0466  | -1.0064 |
| PH02Gene44838 | RecName: Full=Glucose-1-phosphate adenylyltransferase large subunit 1,                                                                                               | 1.6609 | -0.3617 | -0.2843 | -1.0148 |

|               |                                                                                                                                                                       |         |         |         |         |
|---------------|-----------------------------------------------------------------------------------------------------------------------------------------------------------------------|---------|---------|---------|---------|
|               | chloroplastic/amyloplastic; AltName: Full=ADP-glucose pyrophosphorylase; AltName: Full=ADP-gl                                                                         |         |         |         |         |
| PH02Gene48441 | RecName: Full=Sucrose synthase 4; Short=OsSUS4; AltName: Full=Sucrose-UDP glucosyltransferase 4                                                                       | 1.6844  | -0.2068 | -0.6198 | -0.8579 |
| PH02Gene03303 | RecName: Full=Beta-glucosidase 12; Short=Os4bglu12; Flags: Precursor                                                                                                  | 1.7318  | -0.5503 | -0.5907 | -0.5907 |
| PH02Gene09014 | RecName: Full=Beta-glucosidase 25; Short=Os6bglu25; Flags: Precursor                                                                                                  | 1.7189  | -0.4450 | -0.7712 | -0.5027 |
| PH02Gene14465 | RecName: Full=Nudix hydrolase 14, chloroplastic; Short=AtNUDT14; AltName: Full=ADP-sugar diphosphatase; Short=AtASPP; Flags: Precursor                                | 1.7249  | -0.4304 | -0.6744 | -0.6202 |
| PH02Gene21236 | RecName: Full=Probable alpha,alpha-trehalose-phosphate synthase                                                                                                       | 1.7037  | -0.7810 | -0.2858 | -0.6369 |
| PH02Gene27242 | RecName: Full=Glucose-1-phosphate adenylyltransferase large subunit 1, chloroplastic; AltName: Full=ADP-glucose pyrophosphorylase; AltName: Full=ADP-glucose syntha   | 1.7311  | -0.5667 | -0.6278 | -0.5366 |
| PH02Gene48823 | RecName: Full=Alpha,alpha-trehalose-phosphate synthase                                                                                                                | 1.7116  | -0.8202 | -0.4307 | -0.4607 |
| PH02Gene04423 | RecName: Full=Sucrose synthase 1; Short=OsSUS1; AltName: Full=Sucrose synthase 2; Short=RSs2; AltName: Full=Sucrose-UDP glucosyltransferase 1                         | -1.7206 | 0.7370  | 0.4121  | 0.5715  |
| PH02Gene04686 | RecName: Full=Beta-glucosidase 31; Short=Os9bglu31; Flags: Precursor                                                                                                  | -1.5823 | 0.5269  | -0.0475 | 1.1029  |
| PH02Gene05154 | RecName: Full=Endoglucanase 23; AltName: Full=Endo-1,4-beta glucanase 23; AltName: Full=OsGLU12; Flags: Precursor                                                     | -1.6774 | 0.4422  | 0.2802  | 0.9551  |
| PH02Gene09907 | RecName: Full=Phosphoglucomutase, cytoplasmic 2; Short=PGM 2; AltName: Full=Glucose phosphomutase 2                                                                   | -1.7001 | 0.5992  | 0.2817  | 0.8193  |
| PH02Gene11050 | RecName: Full=Beta-amylase 1, chloroplastic; AltName: Full=1,4-alpha-D-glucan maltohydrolase; AltName: Full=Beta-amylase 7; AltName: Full=Thioredoxin-regulated beta  | -1.5489 | 0.4611  | -0.0872 | 1.1750  |
| PH02Gene13448 | RecName: Full=Glucose-6-phosphate isomerase, cytosolic; Short=GPI; AltName: Full=Phosphoglucose isomerase; Short=PGI; AltName: Full=Phosphohexose isomerase; Short=PH | -1.7234 | 0.6507  | 0.4118  | 0.6610  |
| PH02Gene14729 | RecName: Full=Probable alpha,alpha-trehalose-phosphate synthase                                                                                                       | -1.6827 | 0.7143  | 0.1766  | 0.7918  |
| PH02Gene15089 | RecName: Full=Probable alpha,alpha-trehalose-phosphate synthase                                                                                                       | -1.6714 | 0.5447  | 0.1925  | 0.9342  |

|               |                                                                                                                                                                       |         |        |        |        |
|---------------|-----------------------------------------------------------------------------------------------------------------------------------------------------------------------|---------|--------|--------|--------|
| PH02Gene20325 | RecName: Full=Probable trehalose-phosphate phosphatase 1; Short=OsTPP1; AltName: Full=Trehalose 6-phosphate phosphatase                                               | -1.6522 | 0.2872 | 0.3246 | 1.0404 |
| PH02Gene27125 | RecName: Full=Fructokinase-1; AltName: Full=Fructokinase I; AltName: Full=OsFKI                                                                                       | -1.6510 | 0.4712 | 0.1678 | 1.0120 |
| PH02Gene28586 | RecName: Full=Glucan endo-1,3-beta-glucosidase 6; AltName: Full=(1-3)-beta-glucan endohydrolase 6; Short=(1-3)-beta-glucanase 6; AltName: Full=Beta-1,3-endoglucan    | -1.7207 | 0.7469 | 0.4275 | 0.5463 |
| PH02Gene30298 | RecName: Full=UTP--glucose-1-phosphate uridylyltransferase; AltName: Full=UDP-glucose pyrophosphorylase; Short=UDPGP; Short=UGPase                                    | -1.6661 | 0.5480 | 0.1725 | 0.9456 |
| PH02Gene30801 | RecName: Full=Alpha,alpha-trehalose-phosphate synthase                                                                                                                | -1.7013 | 0.6926 | 0.2622 | 0.7465 |
| PH02Gene32320 | RecName: Full=Beta-amylase 3, chloroplastic; AltName: Full=1,4-alpha-D-glucan maltohydrolase; AltName: Full=Beta-amylase 8; AltName: Full=Chloroplast beta-amylase;   | -1.6837 | 0.3910 | 0.3489 | 0.9437 |
| PH02Gene35802 | RecName: Full=Phosphoglucomutase, cytoplasmic 2; Short=PGM 2; AltName: Full=Glucose phosphomutase 2                                                                   | -1.7269 | 0.5750 | 0.4675 | 0.6845 |
| PH02Gene36763 | RecName: Full=Lysosomal beta glucosidase; Flags: Precursor                                                                                                            | -1.7173 | 0.4449 | 0.4890 | 0.7834 |
| PH02Gene37603 | RecName: Full=Fructokinase-2; AltName: Full=Fructokinase II; AltName: Full=OsFKII                                                                                     | -1.7278 | 0.5824 | 0.4735 | 0.6719 |
| PH02Gene41019 | RecName: Full=Hexokinase-3; AltName: Full=Hexokinase-8                                                                                                                | -1.6151 | 0.4821 | 0.0579 | 1.0751 |
| PH02Gene43583 | RecName: Full=Fructokinase-2; AltName: Full=Fructokinase II; AltName: Full=OsFKII                                                                                     | -1.7149 | 0.5048 | 0.4152 | 0.7949 |
| PH02Gene44962 | RecName: Full=Beta-glucosidase 25; Short=Os6bglu25; Flags: Precursor                                                                                                  | -1.7094 | 0.4883 | 0.3940 | 0.8271 |
| PH02Gene46034 | RecName: Full=Sucrose synthase 1; Short=OsSUS1; AltName: Full=Sucrose synthase 2; Short=RSs2; AltName: Full=Sucrose-UDP glucosyltransferase 1                         | -1.7212 | 0.5877 | 0.4090 | 0.7245 |
| PH02Gene47722 | RecName: Full=Sucrose synthase 7; Short=OsSUS7; AltName: Full=Sucrose-UDP glucosyltransferase 7                                                                       | -1.7280 | 0.4672 | 0.6064 | 0.6544 |
| PH02Gene05641 | RecName: Full=UTP--glucose-1-phosphate uridylyltransferase; AltName: Full=UDP-glucose pyrophosphorylase; Short=UDPGP; Short=UGPase                                    | -1.6404 | 0.1072 | 0.5194 | 1.0138 |
| PH02Gene09580 | RecName: Full=Sucrose:sucrose 1-fructosyltransferase; AltName: Full=Sucrose 1(F)-fructosyltransferase; AltName: Full=Sucrose:sucrose 1(F)-beta-D-fructosyltransferase | -1.6889 | 0.2671 | 0.5300 | 0.8918 |
| PH02Gene14100 | RecName: Full=Lysosomal beta glucosidase; Flags: Precursor                                                                                                            | -1.6140 | 0.1884 | 0.2985 | 1.1272 |

|               |                                                                                                                                                                       |         |         |         |         |
|---------------|-----------------------------------------------------------------------------------------------------------------------------------------------------------------------|---------|---------|---------|---------|
| PH02Gene26917 | RecName: Full=Probable trehalose-phosphate phosphatase 7; Short=OsTPP7; AltName: Full=Trehalose 6-phosphate phosphatase                                               | -1.6302 | 0.0108  | 0.6848  | 0.9346  |
| PH02Gene27917 | RecName: Full=Sucrose synthase 7; Short=OsSUS7; AltName: Full=Sucrose-UDP glucosyltransferase 7                                                                       | -1.5873 | 0.0725  | 0.3525  | 1.1623  |
| PH02Gene33818 | RecName: Full=Beta-amylase 1, chloroplastic; AltName: Full=1,4-alpha-D-glucan maltohydrolase; AltName: Full=Beta-amylase 7; AltName: Full=Thioredoxin-regulated beta  | -1.4746 | -0.1084 | 0.2619  | 1.3211  |
| PH02Gene06193 | RecName: Full=Beta-fructofuranosidase, insoluble isoenzyme 2; AltName: Full=Cell wall beta-fructosidase 2; AltName: Full=Invertase 2; AltName: Full=OsCIN2; AltName   | -1.5056 | 0.6623  | -0.2635 | 1.1068  |
| PH02Gene20078 | RecName: Full=Sucrose:sucrose 1-fructosyltransferase; AltName: Full=Sucrose 1(F)-fructosyltransferase; AltName: Full=Sucrose:sucrose 1(F)-beta-D-fructosyltransferase | -1.4129 | 0.6516  | -0.4222 | 1.1835  |
| PH02Gene26446 | RecName: Full=Beta-fructofuranosidase, insoluble isoenzyme 1; AltName: Full=Cell wall beta-fructosidase 1; AltName: Full=Invertase 1; AltName: Full=OsCIN1; AltName   | -1.6366 | 0.8507  | 0.0128  | 0.7731  |
| PH02Gene47631 | RecName: Full=Endoglucanase 23; AltName: Full=Endo-1,4-beta glucanase 23; AltName: Full=OsGLU12; Flags: Precursor                                                     | -1.6516 | 0.6660  | 0.0787  | 0.9069  |
| PH02Gene08635 | RecName: Full=Beta-glucosidase 31; Short=Os9bglu31; Flags: Precursor                                                                                                  | 1.4520  | 0.4059  | -0.9532 | -0.9046 |
| PH02Gene10364 | RecName: Full=Probable trehalase; AltName: Full=Alpha,alpha-trehalase; AltName: Full=Alpha,alpha-trehalose glucohydrolase                                             | 1.4685  | 0.3676  | -0.8106 | -1.0254 |
| PH02Gene13763 | RecName: Full=Alpha,alpha-trehalose-phosphate synthase                                                                                                                | 1.6269  | 0.0180  | -0.8301 | -0.8147 |
| PH02Gene29656 | RecName: Full=1,4-alpha-glucan-branching enzyme 2, chloroplastic/amyloplastic; AltName: Full=Q-enzyme; AltName: Full=Starch-branching enzyme IIB; Flags: Precursor    | 1.6028  | 0.0787  | -0.7662 | -0.9153 |
| PH02Gene38601 | RecName: Full=Beta-glucosidase A; AltName: Full=Beta-D-glucoside glucohydrolase A; AltName: Full=Cellobiase A; AltName: Full=Gentiobiase A; Flags: Precursor          | 1.5863  | 0.1130  | -0.7326 | -0.9666 |
| PH02Gene12539 | RecName: Full=Endoglucanase 10; AltName: Full=Endo-1,4-beta glucanase 10; AltName: Full=OsGLU2                                                                        | -1.5594 | 1.2051  | 0.0141  | 0.3401  |
| PH02Gene16852 | RecName: Full=Beta-fructofuranosidase, insoluble isoenzyme 2; AltName: Full=Cell wall beta-fructosidase 2; AltName: Full=Invertase 2; AltName: Full=OsCIN2; AltName   | -1.6811 | 0.9078  | 0.2273  | 0.5460  |

|               |                                                                                                                                                                         |         |         |         |         |
|---------------|-------------------------------------------------------------------------------------------------------------------------------------------------------------------------|---------|---------|---------|---------|
| PH02Gene23433 | RecName: Full=Beta-glucosidase 4; Short=Os1bglu4                                                                                                                        | -1.7001 | 0.8317  | 0.2915  | 0.5769  |
| PH02Gene24831 | RecName: Full=Hexokinase-5; AltName: Full=Hexokinase I                                                                                                                  | -1.6639 | 0.9214  | 0.1402  | 0.6023  |
| PH02Gene27250 | RecName: Full=Endoglucanase 10; AltName: Full=Endo-1,4-beta glucanase 10; AltName: Full=OsGLU2                                                                          | -1.6231 | 1.1034  | 0.1787  | 0.3410  |
| PH02Gene30830 | RecName: Full=Lysosomal beta glucosidase; Flags: Precursor                                                                                                              | -1.6386 | 1.0310  | 0.1202  | 0.4875  |
| PH02Gene32307 | RecName: Full=Probable alpha-glucosidase Os06g0675700; AltName: Full=Maltase; Flags: Precursor                                                                          | -1.6250 | 1.0945  | 0.1635  | 0.3670  |
| PH02Gene19768 | RecName: Full=Alpha-amylase type A isozyme; AltName: Full=1,4-alpha-D-glucan glucanohydrolase; AltName: Full=AMY1; AltName: Full=Low pI alpha-amylase; Flags: Precursor | -1.4410 | 1.2971  | 0.4115  | -0.2676 |
| PH02Gene26251 | RecName: Full=Probable trehalase; AltName: Full=Alpha,alpha-trehalase; AltName: Full=Alpha,alpha-trehalose glucohydrolase                                               | -1.3779 | 1.4479  | 0.0014  | -0.0714 |
| PH02Gene47638 | RecName: Full=Beta-glucosidase 28; Short=Os8bglu28; Flags: Precursor                                                                                                    | -1.5953 | 1.1301  | 0.4192  | 0.0460  |
| PH02Gene20050 | RecName: Full=Beta-glucosidase 34; Short=Os10bglu34; Flags: Precursor                                                                                                   | -1.3525 | -0.4644 | 0.5183  | 1.2986  |
| PH02Gene41803 | RecName: Full=Beta-glucosidase 16; Short=Os4bglu16; Flags: Precursor                                                                                                    | -1.3692 | -0.5329 | 0.8244  | 1.0778  |
| PH02Gene22525 | RecName: Full=Probable alpha,alpha-trehalose-phosphate synthase                                                                                                         | -1.1097 | -0.4318 | -0.0641 | 1.6056  |
| PH02Gene41109 | RecName: Full=Probable trehalose-phosphate phosphatase 6; Short=OsTPP6; AltName: Full=Trehalose 6-phosphate phosphatase                                                 | -0.9198 | -0.2185 | -0.5396 | 1.6778  |
| PH02Gene42897 | RecName: Full=Probable alpha,alpha-trehalose-phosphate synthase                                                                                                         | -1.2927 | -0.2320 | 0.0164  | 1.5083  |
| PH02Gene45438 | RecName: Full=Hexokinase-7; AltName: Full=Hexokinase-6                                                                                                                  | -1.3082 | 0.1779  | -0.3344 | 1.4647  |

Note:(1)description: name of gene code. (2)There are four growth and development stages of bamboo shoots: the expression level after standardization.

**Table S5** Heat map analysis of DEGs involved in starch and sucrose metabolism pathway at the base of Moso bamboo shoots

| Gene_id       | Gene Description                                                                                                                                                     | S0_B   | S1_B    | S2_B    | S3_B    |
|---------------|----------------------------------------------------------------------------------------------------------------------------------------------------------------------|--------|---------|---------|---------|
| PH02Gene01052 | RecName: Full=Soluble starch synthase 2-2, chloroplastic/amyloplastic; AltName: Full=Soluble starch synthase II-2; Flags: Precursor                                  | 1.6965 | -0.2487 | -0.6461 | -0.8017 |
| PH02Gene01266 | RecName: Full=Isoamylase 3, chloroplastic; Short=AtISA3; Flags: Precursor                                                                                            | 1.6725 | -0.3381 | -0.3525 | -0.9820 |
| PH02Gene05747 | RecName: Full=Probable sucrose-phosphate synthase 1; AltName: Full=UDP-glucose-fructose-phosphate glucosyltransferase                                                | 1.7316 | -0.5963 | -0.5390 | -0.5963 |
| PH02Gene05928 | RecName: Full=Isoamylase 3, chloroplastic; Short=AtISA3; Flags: Precursor                                                                                            | 1.6990 | -0.5285 | -0.3120 | -0.8584 |
| PH02Gene06165 | RecName: Full=1,4-alpha-glucan-branching enzyme 1, chloroplastic/amyloplastic; AltName: Full=Starch branching enzyme I; Flags: Precursor                             | 1.7136 | -0.3379 | -0.6493 | -0.7265 |
| PH02Gene13620 | RecName: Full=Glucose-1-phosphate adenylyltransferase small subunit, chloroplastic/amyloplastic; AltName: Full=ADP-glucose pyrophosphorylase; AltName: Full=ADP-glu  | 1.7056 | -0.6737 | -0.2871 | -0.7447 |
| PH02Gene22653 | RecName: Full=Beta-glucosidase 1; Short=Os1bglu1; Flags: Precursor                                                                                                   | 1.7032 | -0.3619 | -0.4857 | -0.8556 |
| PH02Gene25500 | RecName: Full=Glucose-1-phosphate adenylyltransferase large subunit 1, chloroplastic/amyloplastic; AltName: Full=ADP-glucose pyrophosphorylase; AltName: Full=ADP-gl | 1.7281 | -0.4916 | -0.5569 | -0.6796 |
| PH02Gene29656 | RecName: Full=1,4-alpha-glucan-branching enzyme 2, chloroplastic/amyloplastic; AltName: Full=Q-enzyme; AltName: Full=Starch-branching enzyme IIB; Flags: Precursor   | 1.6540 | -0.2667 | -0.3540 | -1.0333 |
| PH02Gene37359 | RecName: Full=Granule-bound starch synthase 1b, chloroplastic/amyloplastic; AltName: Full=Granule-bound starch synthase Ib; Flags: Precursor                         | 1.6587 | -0.2487 | -0.3945 | -1.0155 |
| PH02Gene38601 | RecName: Full=Beta-glucosidase A; AltName: Full=Beta-D-glucoside glucohydrolase A; AltName: Full=Cellobiase A; AltName: Full=Gentiobiase A; Flags: Precursor         | 1.6497 | -0.1115 | -0.5653 | -0.9728 |
| PH02Gene38723 | RecName: Full=Alpha-1,4 glucan phosphorylase L-2 isozyme, chloroplastic/amyloplastic; AltName: Full=Starch phosphorylase L-2; Flags: Precursor                       | 1.7085 | -0.3942 | -0.4814 | -0.8329 |
| PH02Gene44838 | RecName: Full=Glucose-1-phosphate adenylyltransferase large subunit 1,                                                                                               | 1.6503 | -0.0865 | -0.6299 | -0.9339 |



|               |                                                                                                                                                                       |         |         |        |        |
|---------------|-----------------------------------------------------------------------------------------------------------------------------------------------------------------------|---------|---------|--------|--------|
|               | chloroplastic/amyloplastic; AltName: Full=ADP-glucose pyrophosphorylase; AltName: Full=ADP-gl                                                                         |         |         |        |        |
| PH02Gene02876 | RecName: Full=Beta-amylase 3, chloroplastic; AltName: Full=1,4-alpha-D-glucan maltohydrolase; AltName: Full=Beta-amylase 8; AltName: Full=Chloroplast beta-amylase;   | -1.2953 | -0.3313 | 1.4802 | 0.1463 |
| PH02Gene09572 | RecName: Full=Sucrose synthase 5; Short=OsSUS5; AltName: Full=Sucrose-UDP glucosyltransferase 5                                                                       | -1.3882 | -0.2517 | 1.3966 | 0.2432 |
| PH02Gene19719 | RecName: Full=Sucrose synthase 7; Short=OsSUS7; AltName: Full=Sucrose-UDP glucosyltransferase 7                                                                       | -1.5769 | 0.0608  | 1.1825 | 0.3337 |
| PH02Gene04423 | RecName: Full=Sucrose synthase 1; Short=OsSUS1; AltName: Full=Sucrose synthase 2; Short=RSs2; AltName: Full=Sucrose-UDP glucosyltransferase 1                         | -1.7233 | 0.7215  | 0.4373 | 0.5645 |
| PH02Gene05641 | RecName: Full=UTP--glucose-1-phosphate uridylyltransferase; AltName: Full=UDP-glucose pyrophosphorylase; Short=UDPGP; Short=UGPase                                    | -1.7251 | 0.5176  | 0.4875 | 0.7201 |
| PH02Gene09580 | RecName: Full=Sucrose:sucrose 1-fructosyltransferase; AltName: Full=Sucrose 1(F)-fructosyltransferase; AltName: Full=Sucrose:sucrose 1(F)-beta-D-fructosyltransferase | -1.6580 | 0.0827  | 0.7454 | 0.8299 |
| PH02Gene12539 | RecName: Full=Endoglucanase 10; AltName: Full=Endo-1,4-beta glucanase 10; AltName: Full=OsGLU2                                                                        | -1.7258 | 0.7114  | 0.4838 | 0.5305 |
| PH02Gene14100 | RecName: Full=Lysosomal beta glucosidase; Flags: Precursor                                                                                                            | -1.7102 | 0.5218  | 0.3744 | 0.8141 |
| PH02Gene14729 | RecName: Full=Probable alpha,alpha-trehalose-phosphate synthase                                                                                                       | -1.7115 | 0.3278  | 0.7467 | 0.6370 |
| PH02Gene15089 | RecName: Full=Probable alpha,alpha-trehalose-phosphate synthase                                                                                                       | -1.6283 | -0.0139 | 0.8257 | 0.8165 |
| PH02Gene20325 | RecName: Full=Probable trehalose-phosphate phosphatase 1; Short=OsTPP1; AltName: Full=Trehalose 6-phosphate phosphatase                                               | -1.6977 | 0.2555  | 0.6425 | 0.7998 |
| PH02Gene26446 | RecName: Full=Beta-fructofuranosidase, insoluble isoenzyme 1; AltName: Full=Cell wall beta-fructosidase 1; AltName: Full=Invertase 1; AltName: Full=OsCIN1; AltName   | -1.7248 | 0.6106  | 0.4313 | 0.6828 |
| PH02Gene27917 | RecName: Full=Sucrose synthase 7; Short=OsSUS7; AltName: Full=Sucrose-UDP glucosyltransferase 7                                                                       | -1.6827 | 0.3571  | 0.9478 | 0.3778 |
| PH02Gene29429 | RecName: Full=Sucrose synthase 7; Short=OsSUS7; AltName: Full=Sucrose-UDP                                                                                             | -1.6544 | 0.0680  | 0.8025 | 0.7839 |

|               |                                                                                        |         |         |         |        |
|---------------|----------------------------------------------------------------------------------------|---------|---------|---------|--------|
|               | glucosyltransferase 7                                                                  |         |         |         |        |
| PH02Gene43583 | RecName: Full=Fructokinase-2; AltName: Full=Fructokinase II; AltName: Full=OsFKII      | -1.6752 | 0.1876  | 0.5823  | 0.9053 |
| PH02Gene44962 | RecName: Full=Beta-glucosidase 25; Short=Os6bglu25; Flags: Precursor                   | -1.7267 | 0.4615  | 0.6826  | 0.5826 |
|               | RecName: Full=Sucrose synthase 1; Short=OsSUS1; AltName: Full=Sucrose synthase 2;      |         |         |         |        |
| PH02Gene46034 | Short=RSs2; AltName: Full=Sucrose-UDP glucosyltransferase 1                            | -1.6904 | 0.2550  | 0.5640  | 0.8715 |
| PH02Gene04686 | RecName: Full=Beta-glucosidase 31; Short=Os9bglu31; Flags: Precursor                   | -1.5126 | -0.1998 | 0.5351  | 1.1772 |
|               | RecName: Full=Beta-fructofuranosidase 1; AltName: Full=Invertase 1; AltName:           |         |         |         |        |
| PH02Gene05690 | Full=Sucrose 1; Flags: Precursor                                                       | -1.5279 | -0.2227 | 0.6713  | 1.0794 |
| PH02Gene22525 | RecName: Full=Probable alpha,alpha-trehalose-phosphate synthase                        | -1.1977 | -0.7713 | 0.8584  | 1.1107 |
|               | RecName: Full=Probable trehalose-phosphate phosphatase 7; Short=OsTPP7; AltName:       |         |         |         |        |
| PH02Gene26917 | Full=Trehalose 6-phosphate phosphatase                                                 | -1.5229 | -0.2629 | 0.7999  | 0.9859 |
| PH02Gene30801 | RecName: Full=Alpha,alpha-trehalose-phosphate synthase                                 | -1.5951 | -0.0212 | 0.5355  | 1.0809 |
|               | RecName: Full=Beta-amylase 1, chloroplastic; AltName: Full=1,4-alpha-D-glucan          |         |         |         |        |
| PH02Gene33818 | maltohydrolase; AltName: Full=Beta-amylase 7; AltName: Full=Thioredoxin-regulated beta | -1.4523 | -0.2924 | 0.4960  | 1.2487 |
| PH02Gene41803 | RecName: Full=Beta-glucosidase 16; Short=Os4bglu16; Flags: Precursor                   | -1.4784 | -0.3501 | 0.8137  | 1.0147 |
| PH02Gene42897 | RecName: Full=Probable alpha,alpha-trehalose-phosphate synthase                        | -1.4696 | -0.3450 | 0.7143  | 1.1004 |
|               | RecName: Full=Probable trehalose-phosphate phosphatase 7; Short=OsTPP7; AltName:       |         |         |         |        |
| PH02Gene46771 | Full=Trehalose 6-phosphate phosphatase                                                 | -1.5282 | -0.2592 | 0.8959  | 0.8915 |
|               | RecName: Full=Beta-fructofuranosidase, insoluble isoenzyme 2; AltName: Full=Cell wall  |         |         |         |        |
| PH02Gene06193 | beta-fructosidase 2; AltName: Full=Invertase 2; AltName: Full=OsCIN2; AltName          | -1.6795 | 0.9195  | 0.2297  | 0.5302 |
| PH02Gene19810 | RecName: Full=Beta-glucosidase 6; Short=Os3bglu6; Flags: Precursor                     | -1.4761 | 1.3079  | -0.1354 | 0.3036 |
|               | RecName: Full=Endoglucanase 10; AltName: Full=Endo-1,4-beta glucanase 10; AltName:     |         |         |         |        |
| PH02Gene27250 | Full=OsGLU2                                                                            | -1.6451 | 0.9982  | 0.5335  | 0.1134 |
| PH02Gene46133 | RecName: Full=Hexokinase-6; AltName: Full=Hexokinase-2                                 | -1.6491 | 0.8775  | 0.0597  | 0.7120 |
| PH02Gene47637 | RecName: Full=Beta-glucosidase 27; Short=Os8bglu27; Flags: Precursor                   | -1.6146 | 1.0084  | -0.0071 | 0.6133 |
| PH02Gene47638 | RecName: Full=Beta-glucosidase 28; Short=Os8bglu28; Flags: Precursor                   | -1.5934 | 1.1711  | 0.2270  | 0.1952 |

|               |                                                                                                                                                                                      |         |         |         |         |
|---------------|--------------------------------------------------------------------------------------------------------------------------------------------------------------------------------------|---------|---------|---------|---------|
| PH02Gene06290 | RecName: Full=Hexokinase-8; AltName: Full=Hexokinase-4                                                                                                                               | 1.5426  | -0.0753 | -0.2150 | -1.2523 |
| PH02Gene09014 | RecName: Full=Beta-glucosidase 25; Short=Os6bglu25; Flags: Precursor                                                                                                                 | 1.5938  | -0.4220 | -0.0405 | -1.1314 |
| PH02Gene12545 | RecName: Full=Glucose-1-phosphate adenylyltransferase large subunit 1, chloroplastic;<br>AltName: Full=ADP-glucose pyrophosphorylase; AltName: Full=ADP-glucose syntha               | 1.5707  | 0.0796  | -0.5382 | -1.1122 |
| PH02Gene14970 | RecName: Full=1,4-alpha-glucan-branching enzyme 3, chloroplastic/amyloplastic;<br>Short=AtSBE III; AltName: Full=Branching enzyme 1; Short=AtBE1; AltName: Full=Prote                | 1.5195  | -0.0825 | -0.1475 | -1.2895 |
| PH02Gene17166 | RecName: Full=Glucose-1-phosphate adenylyltransferase large subunit 2, chloroplastic;<br>AltName: Full=ADP-glucose pyrophosphorylase; AltName: Full=ADP-glucose syntha               | 1.4768  | 0.1410  | -0.3136 | -1.3042 |
| PH02Gene17228 | RecName: Full=Starch synthase 1, chloroplastic/amyloplastic; AltName: Full=Starch synthase<br>I-2; Short=SS I; Short=SS I-2; Flags: Precursor                                        | 1.4939  | 0.0442  | -0.2290 | -1.3091 |
| PH02Gene26491 | RecName: Full=Sucrose synthase 4; Short=OsSUS4; AltName: Full=Sucrose-UDP<br>glucosyltransferase 4                                                                                   | 1.4996  | -0.2092 | 0.0162  | -1.3066 |
| PH02Gene29455 | RecName: Full=1,4-alpha-glucan-branching enzyme, chloroplastic/amyloplastic; AltName:<br>Full=Q-enzyme; AltName: Full=Starch-branching enzyme; Flags: Precursor                      | 1.2281  | 0.2208  | 0.1102  | -1.5591 |
| PH02Gene31595 | RecName: Full=1,4-alpha-glucan-branching enzyme, chloroplastic/amyloplastic; AltName:<br>Full=Q-enzyme; AltName: Full=Starch-branching enzyme; Flags: Precursor                      | 1.4987  | 0.0141  | -0.2043 | -1.3084 |
| PH02Gene44935 | RecName: Full=Phosphoglucomutase, chloroplastic; Short=PGM; AltName: Full=Glucose<br>phosphomutase; Flags: Precursor                                                                 | 1.5559  | 0.0433  | -0.4133 | -1.1859 |
| PH02Gene11050 | RecName: Full=Beta-amylase 1, chloroplastic; AltName: Full=1,4-alpha-D-glucan<br>maltohydrolase; AltName: Full=Beta-amylase 7; AltName: Full=Thioredoxin-regulated beta              | -1.6649 | 0.4144  | 0.2546  | 0.9958  |
| PH02Gene13448 | RecName: Full=Glucose-6-phosphate isomerase, cytosolic; Short=GPI; AltName:<br>Full=Phosphoglucose isomerase; Short=PGI; AltName: Full=Phosphohexose isomerase;                      | -1.6363 | 0.4109  | 0.1638  | 1.0616  |
| PH02Gene20078 | Short=PH<br>RecName: Full=Sucrose:sucrose 1-fructosyltransferase; AltName: Full=Sucrose<br>1(F)-fructosyltransferase; AltName: Full=Sucrose:sucrose 1(F)-beta-D-fructosyltransferase | -1.6568 | 0.3025  | 0.3262  | 1.0281  |
| PH02Gene24831 | RecName: Full=Hexokinase-5; AltName: Full=Hexokinase I                                                                                                                               | -1.5935 | 0.6864  | -0.0840 | 0.9912  |

|               |                                                                                       |         |         |        |         |
|---------------|---------------------------------------------------------------------------------------|---------|---------|--------|---------|
| PH02Gene27125 | RecName: Full=Fructokinase-1; AltName: Full=Fructokinase I; AltName: Full=OsFKI       | -1.6656 | 0.3489  | 0.3141 | 1.0027  |
|               | RecName: Full=Probable trehalose-phosphate phosphatase 6; Short=OsTPP6; AltName:      | -1.6619 | 0.3374  | 0.3107 | 1.0138  |
| PH02Gene31459 | Full=Trehalose 6-phosphate phosphatase                                                |         |         |        |         |
| PH02Gene37603 | RecName: Full=Fructokinase-2; AltName: Full=Fructokinase II; AltName: Full=OsFKII     | -1.6749 | 0.4127  | 0.2936 | 0.9686  |
| PH02Gene45438 | RecName: Full=Hexokinase-7; AltName: Full=Hexokinase-6                                | -1.5557 | 0.2258  | 0.0972 | 1.2326  |
|               | RecName: Full=Probable trehalase; AltName: Full=Alpha,alpha-trehalase; AltName:       | -1.0635 | 0.9789  | 1.0188 | -0.9342 |
| PH02Gene26251 | Full=Alpha,alpha-trehalose glucohydrolase                                             |         |         |        |         |
|               | RecName: Full=Alpha-amylase; AltName: Full=1,4-alpha-D-glucan glucohydrolase;         | -1.3011 | 1.0523  | 0.8889 | -0.6401 |
| PH02Gene37127 | AltName: Full=Alpha-amylase isozyme 1B; Flags: Precursor                              |         |         |        |         |
|               | RecName: Full=UTP--glucose-1-phosphate uridylyltransferase; AltName: Full=UDP-glucose | -1.4300 | -0.1435 | 0.1967 | 1.3769  |
| PH02Gene30298 | pyrophosphorylase; Short=UDPGP; Short=UGPase                                          |         |         |        |         |
|               | RecName: Full=Beta-amylase 3, chloroplastic; AltName: Full=1,4-alpha-D-glucan         | -1.3938 | -0.1313 | 0.1005 | 1.4247  |
| PH02Gene32320 | maltohydrolase; AltName: Full=Beta-amylase 8; AltName: Full=Chloroplast beta-amylase; |         |         |        |         |
|               | RecName: Full=Sucrose synthase 7; Short=OsSUS7; AltName: Full=Sucrose-UDP             | -1.2869 | -0.4207 | 0.2586 | 1.4491  |
| PH02Gene47723 | glucosyltransferase 7                                                                 |         |         |        |         |
| PH02Gene40204 | _                                                                                     | -1.3790 | 0.3149  | 1.3785 | -0.3144 |
|               | RecName: Full=Sucrose synthase 7; Short=OsSUS7; AltName: Full=Sucrose-UDP             | -1.6349 | 0.6313  | 0.9628 | 0.0409  |
| PH02Gene47722 | glucosyltransferase 7                                                                 |         |         |        |         |

Note:(1)description: name of gene code. (2)There are four growth and development stages of bamboo shoots: the expression level after standardization.

**Table S6** Co-expression network of DEGs at the top of Moso bamboo shoots

| gene id       | degree   | description                                                                                                                                                         |
|---------------|----------|---------------------------------------------------------------------------------------------------------------------------------------------------------------------|
| PH02Gene26491 | 15.54354 | RecName: Full=Sucrose synthase 4; Short=OsSUS4; AltName: Full=Sucrose-UDP glucosyltransferase 4                                                                     |
| PH02Gene07829 | 15.03386 | RecName: Full=Probable sucrose-phosphate synthase 4; AltName: Full=Sucrose phosphate synthase 4F; Short=OsSPS4F; AltName: Full=UDP-glucose-fructose-phosphate gluco |
| PH02Gene01052 | 14.97322 | RecName: Full=Soluble starch synthase 2-2, chloroplastic/amyloplastic; AltName: Full=Soluble starch synthase II-2; Flags: Precursor                                 |
| PH02Gene48441 | 14.91505 | RecName: Full=Sucrose synthase 4; Short=OsSUS4; AltName: Full=Sucrose-UDP glucosyltransferase 4                                                                     |
| PH02Gene13620 | 14.41779 | RecName: Full=Glucose-1-phosphate adenylyltransferase small subunit, chloroplastic/amyloplastic; AltName: Full=ADP-glucose pyrophosphorylase; AltName: Full=ADP-glu |
| PH02Gene17166 | 14.16257 | RecName: Full=Glucose-1-phosphate adenylyltransferase large subunit 2, chloroplastic; AltName: Full=ADP-glucose pyrophosphorylase; AltName: Full=ADP-glucose syntha |
| PH02Gene12545 | 13.99325 | RecName: Full=Glucose-1-phosphate adenylyltransferase large subunit 1, chloroplastic; AltName: Full=ADP-glucose pyrophosphorylase; AltName: Full=ADP-glucose syntha |
| PH02Gene39746 | 13.91867 | RecName: Full=Probable inactive beta-glucosidase 14; Short=Os4bglu14; Flags: Precursor                                                                              |
| PH02Gene01266 | 13.79487 | RecName: Full=Isoamylase 3, chloroplastic; Short=AtISA3; Flags: Precursor                                                                                           |
| PH02Gene38601 | 13.55319 | RecName: Full=Beta-glucosidase A; AltName: Full=Beta-D-glucoside glucohydrolase A; AltName: Full=Cellobiase A; AltName: Full=Gentiobiase A; Flags: Precursor        |
| PH02Gene13763 | 13.42544 | RecName: Full=Alpha,alpha-trehalose-phosphate synthase                                                                                                              |

|               |          |                                                                                                                                                                      |
|---------------|----------|----------------------------------------------------------------------------------------------------------------------------------------------------------------------|
| PH02Gene06165 | 13.40999 | RecName: Full=1,4-alpha-glucan-branching enzyme 1, chloroplastic/amyloplastic; AltName: Full=Starch branching enzyme I; Flags: Precursor                             |
| PH02Gene44838 | 13.19952 | RecName: Full=Glucose-1-phosphate adenylyltransferase large subunit 1, chloroplastic/amyloplastic; AltName: Full=ADP-glucose pyrophosphorylase; AltName: Full=ADP-gl |
| PH02Gene18798 | 13.12174 | RecName: Full=Probable alpha,alpha-trehalose-phosphate synthase                                                                                                      |
| PH02Gene14465 | 12.72853 | RecName: Full=Nudix hydrolase 14, chloroplastic; Short=AtNUDT14; AltName: Full=ADP-sugar diphosphatase; Short=AtASPP; Flags: Precursor                               |

Note:(1) degree: Node connectivity. The larger the degree, the more important it is(2) description:Name of gene code

**Table S7** Co-expression network of DEGs at the base of Moso bamboo shoots

| gene id       | degree   | description                                                                                                                                                        |
|---------------|----------|--------------------------------------------------------------------------------------------------------------------------------------------------------------------|
| PH02Gene01266 | 14.90276 | RecName: Full=Isoamylase 3, chloroplastic; Short=AtISA3; Flags: Precursor                                                                                          |
| PH02Gene37359 | 14.69078 | RecName: Full=Granule-bound starch synthase 1b, chloroplastic/amyloplastic; AltName: Full=Granule-bound starch synthase 1b; Flags: Precursor                       |
| PH02Gene29656 | 14.03499 | RecName: Full=1,4-alpha-glucan-branching enzyme 2, chloroplastic/amyloplastic; AltName: Full=Q-enzyme; AltName: Full=Starch-branching enzyme IIB; Flags: Precursor |
| PH02Gene01052 | 13.97282 | RecName: Full=Soluble starch synthase 2-2, chloroplastic/amyloplastic; AltName: Full=Soluble starch synthase II-2; Flags: Precursor                                |
| PH02Gene31595 | 13.81575 | RecName: Full=1,4-alpha-glucan-branching enzyme, chloroplastic/amyloplastic; AltName: Full=Q-enzyme; AltName: Full=Starch-branching enzyme; Flags: Precursor       |
| PH02Gene06290 | 13.75796 | RecName: Full=Hexokinase-8; AltName: Full=Hexokinase-4                                                                                                             |
| PH02Gene26491 | 13.37804 | RecName: Full=Sucrose synthase 4; Short=OsSUS4; AltName: Full=Sucrose-UDP glucosyltransferase 4                                                                    |
| PH02Gene14970 | 13.20047 | RecName: Full=1,4-alpha-glucan-branching enzyme 3, chloroplastic/amyloplastic; Short=AtSBE III; AltName: Full=Branching enzyme 1; Short=AtBE1; AltName: Full=Prote |

---

|               |          |                                                                                                                                                                      |
|---------------|----------|----------------------------------------------------------------------------------------------------------------------------------------------------------------------|
| PH02Gene06165 | 13.00712 | RecName: Full=1,4-alpha-glucan-branching enzyme 1, chloroplastic/amyloplastic; AltName: Full=Starch branching enzyme I; Flags: Precursor                             |
| PH02Gene17228 | 12.77285 | RecName: Full=Starch synthase 1, chloroplastic/amyloplastic; AltName: Full=Starch synthase I-2; Short=SS I; Short=SS I-2; Flags: Precursor                           |
| PH02Gene38723 | 12.54154 | RecName: Full=Alpha-1,4 glucan phosphorylase L-2 isozyme, chloroplastic/amyloplastic; AltName: Full=Starch phosphorylase L-2; Flags: Precursor                       |
| PH02Gene12545 | 12.43129 | RecName: Full=Glucose-1-phosphate adenylyltransferase large subunit 1, chloroplastic; AltName: Full=ADP-glucose pyrophosphorylase; AltName: Full=ADP-glucose syntha  |
| PH02Gene44838 | 12.40378 | RecName: Full=Glucose-1-phosphate adenylyltransferase large subunit 1, chloroplastic/amyloplastic; AltName: Full=ADP-glucose pyrophosphorylase; AltName: Full=ADP-gl |
| PH02Gene05928 | 12.18266 | RecName: Full=Isoamylase 3, chloroplastic; Short=AtISA3; Flags: Precursor                                                                                            |
| PH02Gene38601 | 12.10717 | RecName: Full=Beta-glucosidase A; AltName: Full=Beta-D-glucoside glucohydrolase A; AltName: Full=Cellobiase A; AltName: Full=Gentiobiase A; Flags: Precursor         |

---

Note:(1) degree: Node connectivity. The larger the degree, the more important it is(2) description:Name of gene code

**Table S8** Sequences of qRT-PCR primers used in this study

| Target gene           | Primer          | 5'----3'                |
|-----------------------|-----------------|-------------------------|
| PH02Gene04423         | PH02Gene04423-F | TGCGGTCTTCCGACATTC      |
|                       | PH02Gene04423-R | GGGTCTTGCTGGCACTTA      |
| PH02Gene46034         | PH02Gene46034-F | AGGGTGGGCTTCAGCGTAT     |
|                       | PH02Gene46034-R | AGGTAGCGGCGGGTTTCA      |
| PH02Gene06165         | PH02Gene06165-F | TGAAGCGAGCACAAACAGT     |
|                       | PH02Gene06165-R | TCTTTCCAGCATAGGGTC      |
| PH02Gene11050         | PH02Gene11050-F | CGAAATGGGTATCGGAGGAGA   |
|                       | PH02Gene11050-R | CGCATGAAGTCGGCGTAGCA    |
| Internal control gene | ACT-F           | TACGCTTCCTCACGCTATTCTTC |
|                       | ACT-R           | TTCTCGCTCGGCAGTTGTTG    |
